# Supplementary material for: Impacts of Thermal Processing, High Pressure, and CO2-Assisted High Pressure on Quality Characteristics and Shelf Life of Durian Fruit Puree
Source: MDPI journal article supplement (doi:10.3390/foods11172717), 2022-09-05
Supplement: s1 [file s1]

## Supplementary materials

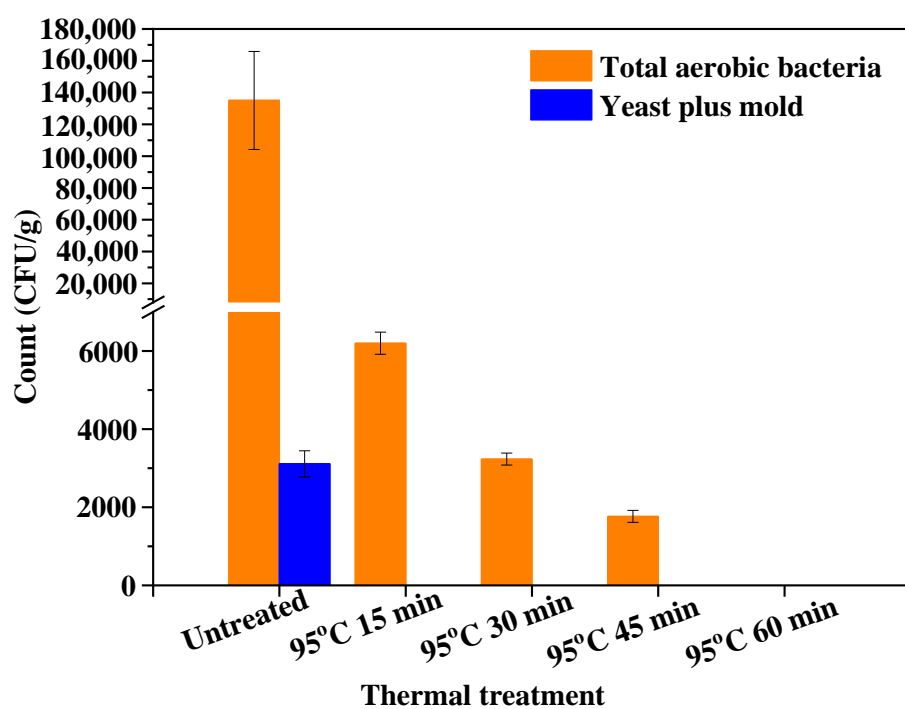

**Figure S1 Effects of TP treatment with different treated time on total aerobic bacteria and yeast plus mold counts of DFP.**

**Table S1 K value and n value of different DFP samples**

| Treatments                | Storage time (days) |            |           |           |            |            |
|---------------------------|---------------------|------------|-----------|-----------|------------|------------|
|                           | 0                   | 7          | 14        | 21        | 28         | 35         |
| Untreated (K)             | 3.2±0.21            | -          | -         | -         | -          | -          |
| TP (K)                    | 4.96±0.51           | 6.54±1.33  | 8.13±1.56 | 6.82±1.29 | 12.88±1.56 | 14.54±2.16 |
| HPP (K)                   | 3.85±0.49           | 6.58±1.11  | 9.58±2.01 | 8.13±1.56 | 7.01±1.36  | 8.84±1.1   |
| CO <sub>2</sub> + HPP (K) | 1.42±0.17           | 1.36±0.05  | 3.56±0.38 | 7.07±1.29 | 7.98±1.24  | 6.23±0.63  |
| Untreated (n)             | 0±0.01              | -          | -         | -         | -          | -          |
| TP (n)                    | 0.14±0.02           | 0.17±0.05  | 0.2±0.05  | 0.13±0.04 | 0.14±0.03  | 0.13±0.03  |
| HPP (n)                   | 0.16±0.03           | 0.26±0.04  | 0.28±0.05 | 0.2±0.05  | 0.12±0.05  | 0.11±0.03  |
| CO <sub>2</sub> + HPP (n) | 0.01±0.03           | -0.05±0.01 | 0.12±0.02 | 0.21±0.04 | 0.21±0.04  | 0.14±0.02  |
